# Supplementary material for: Spectroscopy of YO from first principles
Source: Royal Society of Chemistry journal article supplement (doi:10.1039/c9cp03208h), 2019-01-01
Supplement: c9cp03208h8.xlsx [file c9cp03208h8.xlsx]

## Sheet: SO matrix elements
	YO MRCI/aVTZ calculated spin-orbit coupling matrix elements, cm-1
r, Å	<X2Sigma+|LSx|A2Pi_y>	<X2Sigma+|LSx|C2Pi_y>	<A'2Deltaxx-yy|LSx|A2Pi_y>	<A'2Deltaxx-yy|LSz|A'2Deltaxy>	<A'2Deltaxx-yy|LSx|C2Pi_y>	<B2Sigma+|LSx|A2Pi_y>	<B2Sigma+|LSx|C2Pi_y>	<D2Sigma+|LSx|A2Pi_y>	<D2Sigma+|LSx|C2Pi_y>	<A2Pi_x|LSz|A2Pi_y>	<A2Pi_x|LSz|C2Pi_y>	<C2Pi_x|LSz|C2Pi_y>
1.58	75.8	30.05	19.11	153.95	0.03	158.13	30.4	35.46	163.6	163.05	17.05	80.79
1.59	76.59	30.96	19.58	155.08	0.04	160.75	30.49	35.84	158.66	163.82	16.71	78.12
1.6	77.34	31.78	20.05	156.19	0.05	163.23	30.56	36.26	153.88	164.6	16.38	75.56
1.61	78.05	32.54	20.53	157.29	0.06	165.42	30.59	36.7	149.27	165.4	16.05	73.11
1.62	78.73	33.25	21.02	158.37	0.07	167.37	30.6	37.15	144.83	166.21	15.72	70.76
1.63	79.37	33.91	21.52	159.44	0.09	169.16	30.58	37.65	140.55	167.04	15.4	68.52
1.64	80.17	34.42	22.035	159.8	0.11	169.4	30.27	37.56	135.87	168.81	15.01	66.05
1.65	80.92	34.99	22.655	160.33	0.125	170.05	29.97	37.64	131.49	170.91	14.68	63.84
1.66	81.48	35.55	23.2	161.42	0.14	171.54	29.95	38.26	127.67	171.72	14.36	61.89
1.67	82.01	36.07	23.75	162.52	0.15	172.97	29.93	38.94	123.97	172.52	14.04	60.02
1.68	82.52	36.56	24.315	163.6	0.165	174.35	29.93	39.71	120.39	173.31	13.72	58.23
1.69	83	37.03	24.89	164.69	0.18	175.66	29.94	40.57	116.92	174.09	13.4	56.51
1.7	83.45	37.47	25.48	165.77	0.195	176.92	29.96	41.52	113.56	174.85	13.07	54.85
1.71	83.88	37.88	26.08	166.85	0.21	178.12	30.01	42.58	110.29	175.59	12.75	53.27
1.72	84.27	38.28	26.69	167.93	0.225	179.25	30.08	43.76	107.11	176.32	12.42	51.74
1.73	84.63	38.66	27.31	169	0.24	180.31	30.18	45.08	104.01	177.03	12.1	50.27
1.74	84.96	39.01	27.945	170.07	0.26	181.29	30.31	46.56	101	177.72	11.76	48.86
1.75	85.26	39.35	28.585	171.14	0.28	182.19	30.48	48.21	98.05	178.39	11.43	47.5
1.76	85.53	39.68	29.245	172.2	0.3	182.99	30.69	50.05	95.18	179.04	11.09	46.19
1.77	85.76	39.99	29.91	173.26	0.32	183.68	30.94	52.12	92.35	179.67	10.74	44.93
1.78	85.96	40.28	30.59	174.31	0.34	184.26	31.26	54.45	89.58	180.27	10.39	43.72
1.79	86.13	40.56	31.28	175.36	0.365	184.68	31.64	57.07	86.85	180.85	10.02	42.55
1.8	86.25	40.83	31.985	176.41	0.39	184.94	32.09	60.03	84.14	181.41	9.65	41.43
1.81	86.35	41.09	32.7	177.45	0.42	185	32.64	63.39	81.45	181.94	9.27	40.34
1.82	86.4	41.34	33.425	178.49	0.45	184.8	33.29	67.2	78.76	182.45	8.88	39.29
1.83	86.42	41.59	34.17	179.52	0.485	184.31	34.05	71.55	76.05	182.93	8.47	38.28
1.84	86.39	41.82	34.92	180.56	0.525	183.43	34.96	76.51	73.3	183.38	8.04	37.31
1.85	86.32	42.05	35.685	181.58	0.575	182.08	36.02	82.18	70.48	183.8	7.59	36.36
1.86	86.2	42.28	36.465	182.61	0.625	180.13	37.25	88.67	67.56	184.19	7.12	35.45
1.87	86.03	42.51	37.255	183.63	0.68	177.41	38.67	96.07	64.5	184.54	6.62	34.58
1.88	85.81	42.73	38.055	184.64	0.745	173.74	40.29	104.47	61.24	184.86	6.08	33.73
1.89	85.53	42.97	38.875	185.66	0.825	168.84	42.11	113.95	57.73	185.15	5.49	32.91
1.9	85.17	43.21	39.7	186.67	0.91	162.42	44.11	124.53	53.91	185.4	4.84	32.11
1.91	84.74	43.47	40.545	187.68	1.02	154.05	46.29	136.2	49.66	185.61	4.11	31.35
1.92	84.2	43.76	41.405	188.69	1.155	142.99	48.66	149.04	44.83	185.77	3.27	30.6
1.93	83.52	44.1	42.265	189.69	1.335	127.83	51.3	163.28	39	185.88	2.26	29.88
1.94	82.65	44.53	43.14	190.7	1.565	106.46	54.18	178.52	31.61	185.95	1	29.17
1.95	81.55	45.1	44.02	191.7	1.9	80.51	56.34	191.25	23.35	185.94	-0.67	28.47
1.96	80.27	45.95	44.9	192.71	2.405	60.45	56.53	197.21	17.79	185.83	-3.11	27.74
1.97	78.63	47.41	45.76	193.71	3.305	50.37	55.11	198.66	17.16	185.51	-7.27	26.88
1.98	75.71	50.72	46.495	194.71	5.4	46.8	52.2	198.28	23.44	184.26	-16.65	25.17
1.99	62.41	65.41	45.155	195.7	15.47	52.97	40.91		32.33	167.55	-58.64	8.08
2	-22.98	-87.3	10.65	196.78	-47.515	59.69	17.22			-11.88	51.32	-171.65
2.01	-35	-82.34	3.98	197.76	-49.475	55.28	24.28			-21.97	23.57	-181.97
2.02	-37.93	-80.12	2.25	198.74	-50.54	53.03	25.17			-22.87	15.89	-183.02
2.03	-39.23	-78.6	1.45	199.71	-51.545	51.31	25.04			-22.81	12.17	-183.08
2.04	-39.94	-77.45	0.985	200.66	-52.585	49.81	24.65			-22.52	9.82	-182.97
2.05	-43.65		-1.56	201.6		47.35				-22.38
2.06	-43.52		-1.57	202.5		46.16				-21.85
2.07	-43.39		-1.59	203.38		44.98				-21.32
2.08	-43.25		-1.61	204.26		43.85				-20.81
2.09	-43.1		-1.625	205.16		42.77				-20.33
2.1	-42.95		-1.635	206.04		41.72				-19.86
2.11	-42.8		-1.64	206.91		40.69				-19.41
2.12	-42.64		-1.65	207.76		39.69				-18.97
2.13	-42.47		-1.655	208.59		38.7				-18.54
2.14	-42.3		-1.655	209.39		37.74				-18.13
2.15	-42.12		-1.65	210.16		36.8				-17.72
2.16	-41.94		-1.655	210.9		35.87				-17.33
2.17	-41.75		-1.645	211.6		34.96				-16.94
2.18	-41.56		-1.64	212.27		34.07				-16.56
2.19	-41.36		-1.625	212.9		33.2				-16.19
2.2	-41.16		-1.605	213.48		32.34				-15.83
2.21	-40.96		-1.585	214.01		31.49				-15.48
2.22	-40.75		-1.56	214.48		30.66				-15.14
2.23	-40.53		-1.53	214.88		29.85				-14.8
2.24	-40.31		-1.495	215.2		29.05				-14.48
2.25	-40.09		-1.46	215.42		28.26				-14.15
2.26	-39.87		-1.41	215.51		27.48				-13.84
2.27	-39.64		-1.355	215.42		26.72				-13.53
2.28	-39.4		-1.29	215.08		25.96				-13.23
2.29	-39.05		-0.91	213.06		25.17				-12.89
2.3	-38.81		-0.695	210.22		24.44				-12.6
2.31	-38.56		-0.355	204.2		23.73				-12.32
2.32	-38.32		-0.135	191.75		23.02				-12.04
2.33	-38.09		-0.71	171.77		22.33				-11.77
2.34	-37.84		-1.12	152.07		21.65				-11.51
2.35	-37.59		-1.265	139.15		20.99				-11.25
2.36	-37.33		-1.225	131.77		20.34				-10.99
factor	-i	i	-i	-i	i	i	i	-i	i	-i	-i	i
sigma	-0.5 0.5	-0.5 0.5	-0.5 0.5	0.5 0.5	-0.5 0.5	-0.5 0.5	-0.5 0.5	-0.5 0.5	-0.5 0.5	0.5 0.5	0.5 0.5	0.5 0.5
<x|LZ|y>	0 -i	0 -i	-2i -i	-2i -2i	-2i -i	0 -i	0 -i	0 -i	0 -i	-i -i	-i -i	-i -i
